# Supplementary material for: Acceptance or Distraction First while Suffering Pain? Order Effects on Visual Attention to External Painful Stimuli
Source: Research Square preprint supplement (doi:10.21203/rs.3.rs-7684864/v1), 2025-10-17
Supplement: Supplementary file 1 [file a37190ddcfa471b2266806e3.docx]

**Table 1.** *Cronbach’s alpha for pain and neutral stimuli.*

|  | FFL | | FFD | | NF | | AFD | | TFD | | D | |
| --- | --- | --- | --- | --- | --- | --- | --- | --- | --- | --- | --- | --- |
|  | Pain | Neutral | Pain | Neutral | Pain | Neutral | Pain | Neutral | Pain | Neutral | Pain | Neutral |
| Baseline Task | .67 | .79 | .71 | .81 | .89 | .88 | .82 | .91 | .84 | .83 | .41 | .61 |
| Cold Water Task | .67 | .64 | .85 | .90 | .91 | .85 | .92 | .94 | .79 | .75 | .81 | .80 |
| Room Temperature Water Task | .52 | .62 | .87 | .83 | .87 | .82 | .89 | .89 | .62 | .75 | .40 | .56 |
| Acceptance Task | .70 | .60 | .84 | .88 | .90 | .87 | .87 | .86 | .80 | .74 | .82 | .89 |
| Distraction Task | .57 | .59 | .84 | .88 | .89 | .87 | .86 | .86 | .74 | .77 | .64 | .47 |

**Note:** RT Water Task = Room Temperature Water Task, FFL = First Fixation Latency; FFD = First Fixation Duration; NF = Number of Fixations; AFD = Average Fixation Duration; TFD = Total Fixation Duration; D = Disengagement.

**Table 2.** *Means and standard deviations for age and psychological measures for every group*

|  | **Cold Water Group**  **(N = 30)** | **Room Temperature Water Group**  **(N = 30)** |  |  |
| --- | --- | --- | --- | --- |
|  | Mean (SD) | Mean (SD) | *t* | *p* |
| Age | 23.70 (3.65) | 22.10 (2.56) | 1.96 | .055 |
| PHQ-9 | 7.50 (4.14) | 8.10 (5.97) | -.41 | .67 |
| GAD-7 | 5.70 (4.68) | 6.40 (4.86) | -.52 | .60 |
| PCS Rumination | 10.16 (3.49) | 11.40 (3.36) | -1.39 | .16 |
| PCS Magnification | 6.56 (2.34) | 6.40 (2.01) | .29 | .76 |
| PCS Helplessness | 11.83 (4.06) | 11.86 (4.15) | -.31 | .97 |
| PCS Total | 28.56 (8.82) | 29.66 (7.90) | -.51 | .61 |
| FPQ-III | 52.13 (19.40) | 46.86 (14.57) | 1.18 | .23 |
| ACS | 28.66 (4.81) | 28.86 (5.49) | -.14 | .88 |
| PVAQ-9 | 19.50 (7.99) | 21.93 (7.10) | -1.24 | .21 |
| CERQ-Acceptance | 10.86 (6.07) | 12.46 (2.17) | -1.35 | .18 |
| CERQ-Catastrophizing | 5.76 (3.77) | 7.76 (3.01) | -2.26 | **.02*** |

**Note:** PCS = Pain Catastrophizing Scale; PHQ-9 = Patient Health Questionnaire-9; GAD-7 = General Anxiety Disorder-7; Pain Catastrophizing Scale; FPQ-III = Fear of Pain Questionnaire-III; ACS = Attentional Control Scale; PVAQ-9 = Pain Vigilance and Awareness Questionnaire-9; CERQ = Cognitive Emotion Regulation Questionnaire. (Significant differences are marked in bold).

*p<0.05; **p<0.001

**Table 3.** *Means and standard deviations for pain and neutral faces in the cold and room temperature water groups.*

|  | Cold Water  Time 1 Time 2 | | | | Room Temperature  Time 1 Time 2 | | | | Time x  Group | | | | | Time x  Valence | | | Valence x  Group | | | | Time x Valence  x Group | | | | |
| --- | --- | --- | --- | --- | --- | --- | --- | --- | --- | --- | --- | --- | --- | --- | --- | --- | --- | --- | --- | --- | --- | --- | --- | --- | --- |
|  | Pain | Neutral | Pain | Neutral | Pain | Neutral | Pain | Neutral | |  | |  | |  | |  | |  | |  | | |  | |  | | | |  |
|  | Mean  (SD) | Mean  (SD) | Mean  (SD) | Mean  (SD) | Mean  (SD) | Mean  (SD) | Mean  (SD) | Mean  (SD) | | *F* | | *p* | | *F* | | *p* | | *F* | | *p* | | | *F* | | *p* | | | |  |
| FFL (ms) | 629.45 (22.37) | 685.80 (27.75) | 663.20 (27.95) | 675.32 (29.67) | 588.82 (22.76) | 655.25 (28.22) | 639.93 (28.42) | 637.73 (30.18) | .02 | | .87 | | 6.57 | | .01 | | .00 | | .94 | | | .30 | | .58 | | |  |
| FFD (ms) | 293.40 (20.79) | 257.52 (13.64) | 268.15 (17.82) | 287.98 (20.06) | 296.66 (21.15) | 269.81 (13.88) | 299.38 (18.13) | 318.62 (20.41) | 1.24 | | .27 | | 13.10 | | **< .001**** | | .10 | | .75 | | | .11 | | .73 | | |  |
| NF | 3.85  (.14) | 3.81  (.14) | 3.37  (.15) | 3.31  (.13) | 3.72  (.14) | 3.71  (.14) | 3.56  (.16) | 3.47  (.13) | 4.65 | | **.03*** | | .38 | | .53 | | .00 | | .98 | | | .09 | | .76 | | |  |
| AFD (ms) | 298.13 820.15) | 283.53 (14.32) | 291.93 (16.80) | 313.01 (19.46) | 321.53 (20.50) | 300.12 (14.56) | 331.88 (17.09) | 335.59 (10.79) | .37 | | .54 | | 6.70 | | **.01*** | | 1.64 | | .20 | | | .20 | | .65 | | |  |
| TFD (ms) | 1083.71 (36.25) | 1051.78 (35.28) | 971.11 (32.78) | 1021.62 (37.67) | 1060.15 (36.87) | 1069.98 (35.88) | 1069.94 (33.34) | 1063.19 (38.32) | 3.59 | | .06 | | 1.01 | | .31 | | .03 | | .84 | | | 2.29 | | .13 | | |  |
| D (ms) | 265.30 (14.24) | 270.94 (17.27) | 210.60 (11.07) | 216.65 (13.72) | 264.96 (14.48) | 252.47 (17.56) | 221.65 (11.26) | 242.32 (13.96) | 3.43 | | .06 | | 2.34 | | .13 | | .01 | | .89 | | | 2.22 | | .14 | | |  |

**Note***:* FFL = First Fixation Latency; FFD = First Fixation Duration; NF = Number of fixations; AFD = Average Fixation Duration; TFD = Total Fixation Duration; D = Disengagement

**Table 4.** *Means and standard deviations for pain and neutral faces in the acceptance and distraction strategies.*

|  | **Order: Acceptance → Distraction**  Acceptance Distraction | | | | **Order: Distraction → Acceptance**  Distraction Acceptance | | | | Instruction x Order | | Instruction x Valence | | Valence x Order | | Instruction x Valence x Order | |
| --- | --- | --- | --- | --- | --- | --- | --- | --- | --- | --- | --- | --- | --- | --- | --- | --- |
|  | Pain | Neutral | Pain | Neutral | Pain | Neutral | Pain | Neutral |  |  |  |  |  |  |  |  |
|  | Mean (SD) | Mean (SD) | Mean (SD) | Mean (SD) | Mean (SD) | Mean (SD) | Mean (SD) | Mean (SD) | *F* | *p* | *F* | *p* | *F* | *p* | *F* | *p* |
| FFL (ms) | 683.96 (25.65) | 736.10 (28.56) | 656.41 (25.59) | 658.30 (28.32) | 644.75 (25.15) | 700.19 (27.83) | 635.45 (25.21) | 682.73 (28.06) | 4.92 | **.03*** | .67 | 41 | .56 | .45 | 1.29 | .26 |
| FFD (ms) | 282.67 (21.43) | 263.13 (19.71) | 221.45 (18.08) | 269.85 (18.65) | 315.93 (17.76) | 284.88 (18.32) | 264.64 (21.05) | 297.59 (19.37) | 10.78 | **.002*** | .03 | .85 | 1.18 | .28 | 40.16 | **<.001**** |
| NF | 3.46  (.17) | 3.56  (.15) | 3.63  (.17) | 3.67  (.16) | 3.35  (.17) | 3.38  (.16) | 3.28  (.17) | 3.33  (.15) | .46 | .50 | .14 | .70 | .04 | .83 | .03 | .84 |
| AFD (ms) | 506.62 (28.02) | 298.32 (19.66) | 325.30 (23.79) | 305.27 (20.40) | 499.12 (23.37) | 313.13 (20.04) | 371.41 (27.54) | 327.74 (19.31) | 63.81 | **<.001**** | 1.34 | .25 | .002 | .96 | 69.78 | **<.001**** |
| TFD (ms) | 982.45 (37.53) | 1008.64 (34.82) | 1051.83 (38.00) | 1026.81 (41.24) | 1032.34 (37.34) | 1023.35 (40.52) | 1082.36 (36.88) | 1034.38 (34.21) | 10.29 | **.002*** | .02 | .87 | .35 | .55 | 1.38 | .24 |
| D (ms) | 112.69 (10.50) | 121.00 (12.56) | 230.82 (10.88) | 231.53 (11.44) | 109.42 (10.48) | 119.98 (11.03) | 225.49 (10.12) | 229.88 (12.10) | 337.26 | **<.001**** | .008 | .92 | .09 | .76 | .75 | .39 |

**Note:** FFL = First Fixation Latency; FFD = First Fixation Duration; NF = Number of fixations; AFD = Average Fixation Duration; TFD = Total Fixation Duration; D = Disengagement
